# Supplementary material for: Preparation of η2-complexes of fullerenes by reduction. Crystal structure and optical properties of {Ni(dppp)·(η2-C70)}·(C6H4Cl2)0.5
Source: Royal Society of Chemistry journal article supplement (doi:10.1039/c1dt10839e), 2011-01-01
Supplement: c1dt10839e.pdf [file c1dt10839e.pdf]

**Supporting information.**

**Table S1.** IR spectra of the starting compounds and complex **1**.

| Components                                              | Ni(dppp)Cl <sub>2</sub>                                                                                                                                                                                  | C <sub>70</sub>                                                                 | <i>o</i> -C <sub>6</sub> H <sub>4</sub> Cl <sub>2</sub> | <b>1</b>                                                                                                                                                                                         |
|---------------------------------------------------------|----------------------------------------------------------------------------------------------------------------------------------------------------------------------------------------------------------|---------------------------------------------------------------------------------|---------------------------------------------------------|--------------------------------------------------------------------------------------------------------------------------------------------------------------------------------------------------|
| Ni(dppp)                                                | 476w<br>513s<br>543w<br>667m<br>695s 702s sp<br>713w<br>743s<br>818w<br>917w<br>945m<br>999w<br>1029w<br>1070w<br>1098s<br>1149m<br>1186w<br>1244w<br>1315w<br>1334w<br>1408w<br>1433s<br>1453w<br>1483m |                                                                                 |                                                         | 478w<br>511m<br>540w<br>668m<br>692s 700m sp<br>-<br>745m*<br>826w<br>909w<br>945w<br>999w<br>-<br>-<br>1099s<br>1151w<br>1184w<br>1252w<br>1325w<br>1340m<br>1409w<br>1431s*<br>1454w*<br>1480w |
| C <sub>70</sub>                                         |                                                                                                                                                                                                          | 457w<br>534s<br>564m<br>576s<br>642m<br>673m<br>794m<br>1132w<br>1413w<br>1429s |                                                         | 456w<br>534m<br>564w<br>573w 579w<br>640w<br>673w<br>793w<br>-<br>-<br>1431s*                                                                                                                    |
| <i>o</i> -C <sub>6</sub> H <sub>4</sub> Cl <sub>2</sub> |                                                                                                                                                                                                          |                                                                                 | 657w<br>748s<br>1030m<br>1122m<br>1453m                 | -<br>745m*<br>1034w<br>-<br>1454w*                                                                                                                                                               |

sp - splitted band

\* - the bands are coincided.

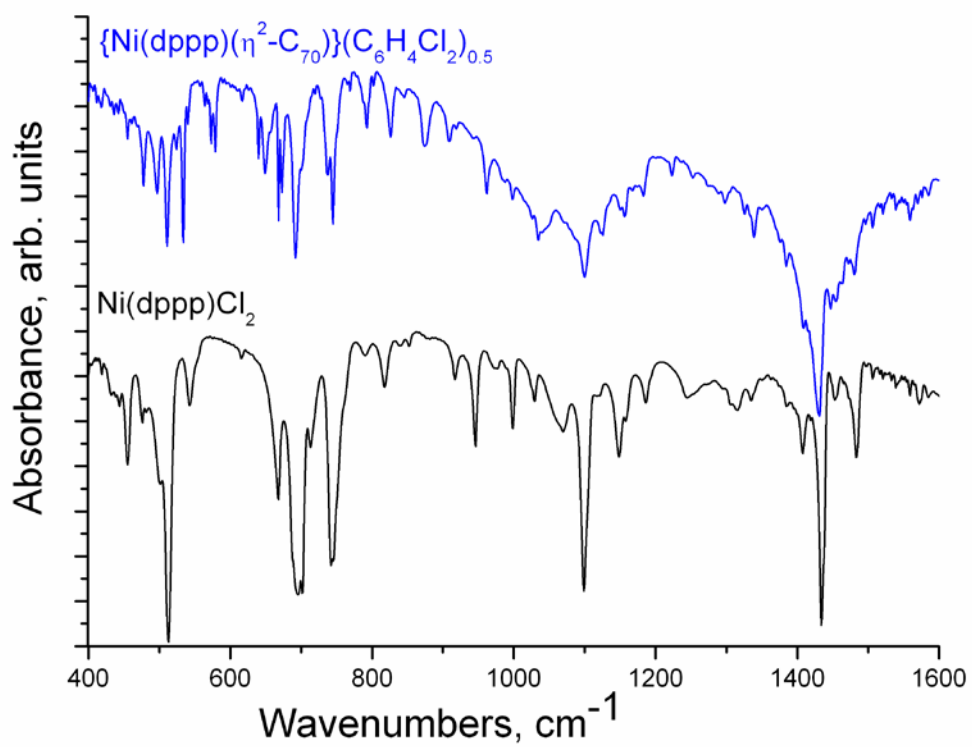

**Fig. 1S.** IR spectra of  $\text{Ni}(\text{dppp})\text{Cl}_2$  and complex **1** in KBr pellet.
